# Supplementary material for: Sustainable and Low Viscous 1-Allyl-3-methylimidazolium Acetate + PEG Solvent for Cellulose Processing
Source: MDPI journal article supplement (doi:10.3390/polym9020054), 2017-02-16
Supplement: s1 [file s1]

# Supplementary Materials: Sustainable and Low Viscous 1-Allyl-3-methylimidazolium Acetate + PEG Solvent for Cellulose Processing

Airong Xu and Quan Li

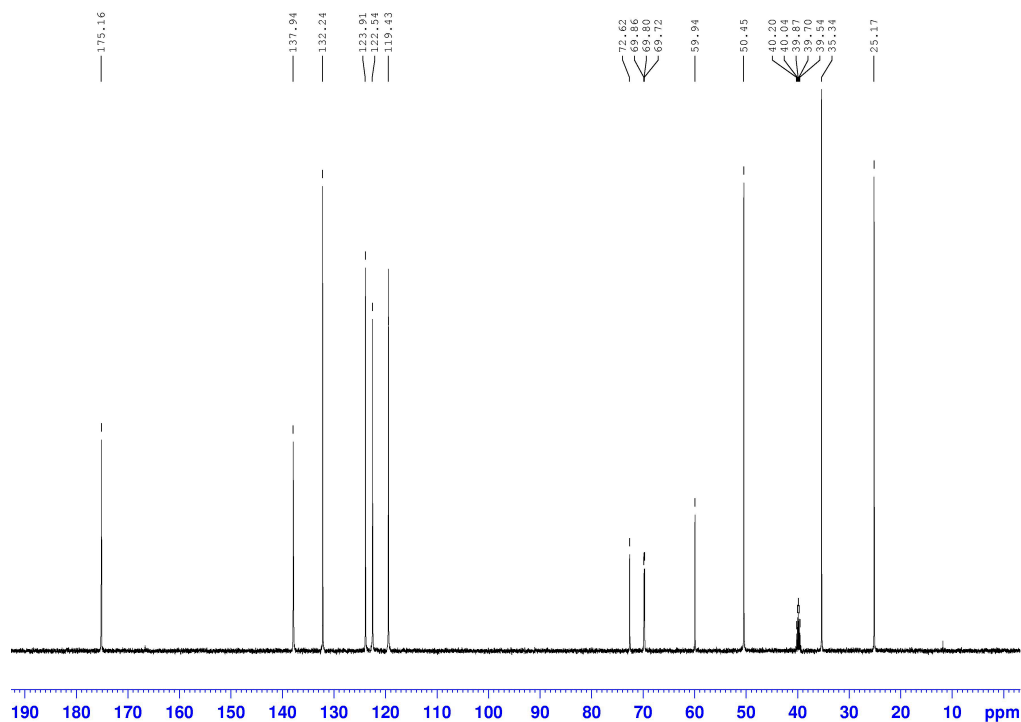

Figure S1. <sup>13</sup>C NMR spectra of [Amim][CH<sub>3</sub>COO] in [Amim][CH<sub>3</sub>COO]/PEG-10 solvent at room temperature.

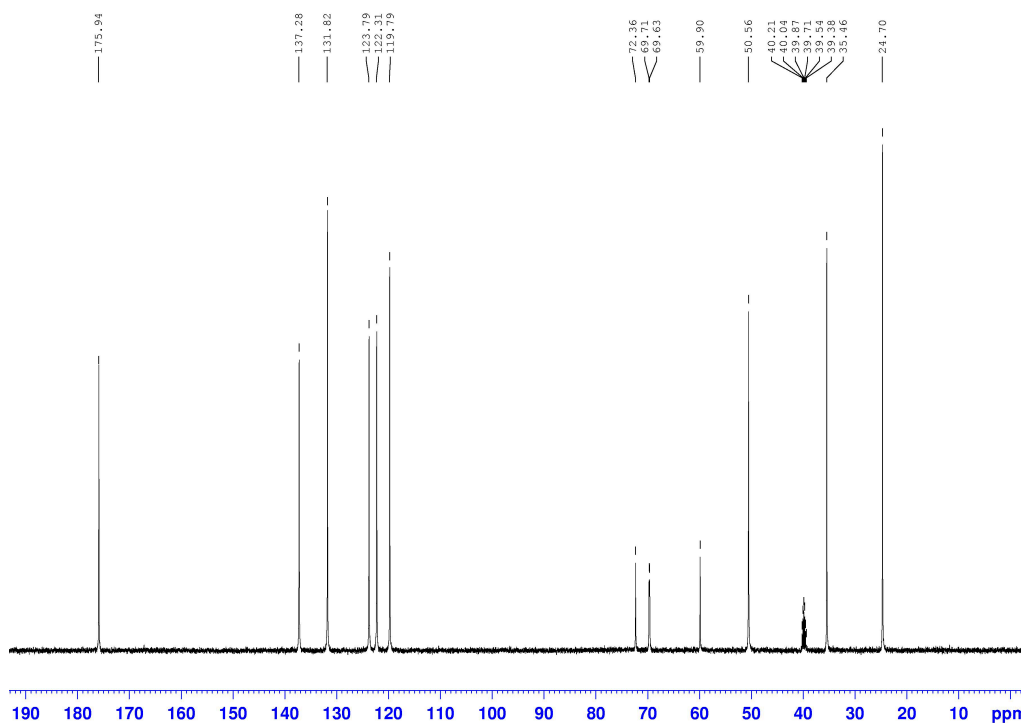

Figure S2. <sup>13</sup>C NMR spectra of [Amim][CH<sub>3</sub>COO] in [Amim][CH<sub>3</sub>COO]/PEG-10/cellulose(8%) solution at room temperature.

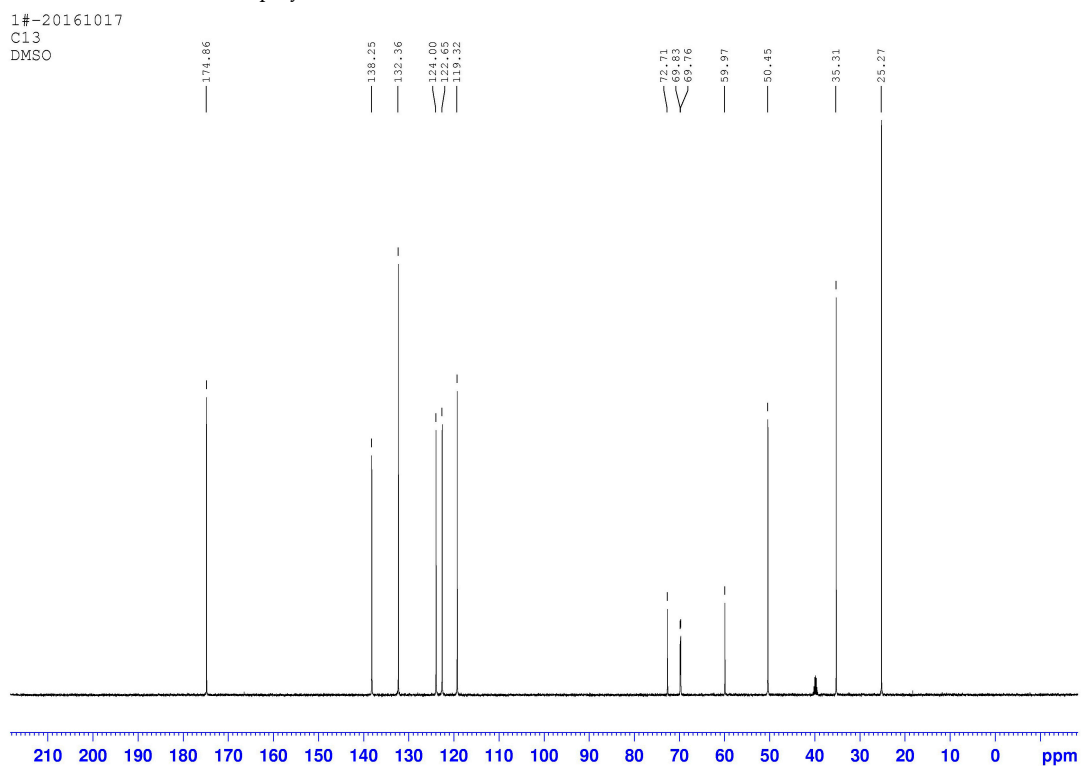

Figure S3. <sup>13</sup>C NMR spectra of the original [Amim][CH<sub>3</sub>COO]/PEG-10 solvent at room temperature.

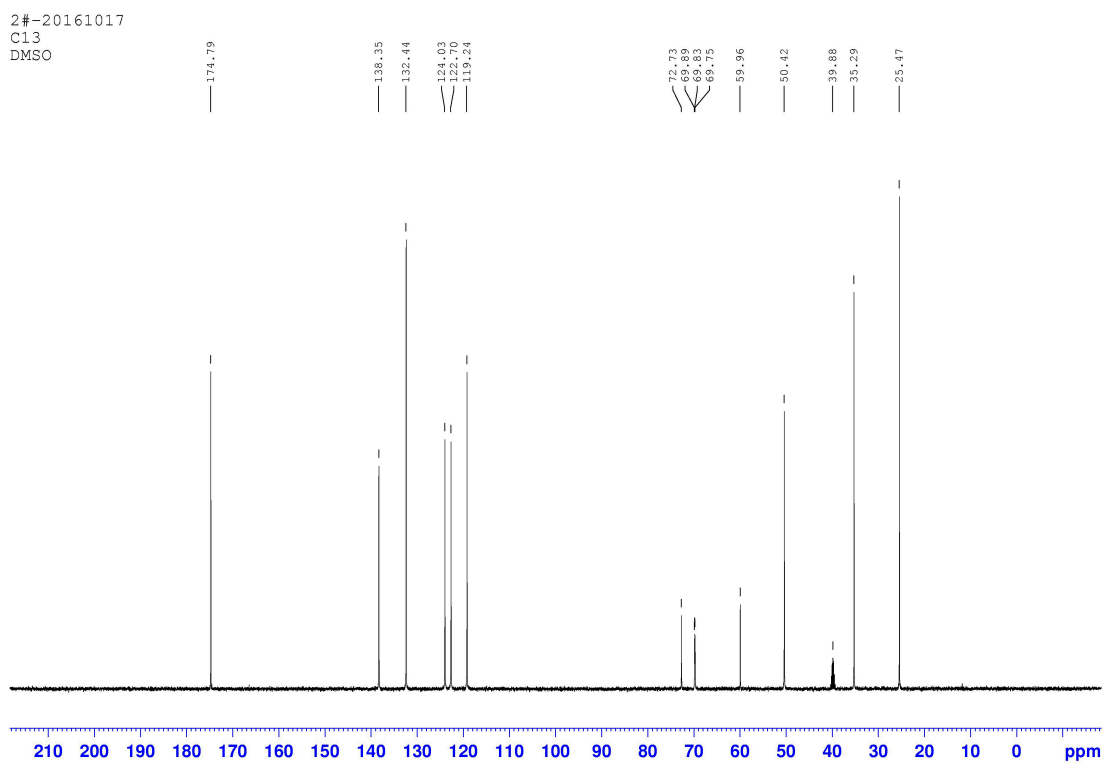

Figure S4. <sup>13</sup>C NMR spectra of the recovered [Amim][CH<sub>3</sub>COO]/PEG-10 solvent at room temperature.
